# Supplementary material for: Binding Selectivity of Inhibitors toward Bromodomains BAZ2A and BAZ2B Uncovered by Multiple Short Molecular Dynamics Simulations and MM-GBSA Calculations
Source: PubMed Central journal article supplement — ACS Omega. 2021 Apr 28;6(18):12036–49. doi: 10.1021/acsomega.1c00687 (PMC8154142; doi:10.1021/acsomega.1c00687), 2021-04-28
Supplement: ao1c00687_si_001.pdf [file ao1c00687_si_001.pdf]

# Supporting Information

## **Binding Selectivity of Inhibitors toward Bromodomains BAZ2A and BAZ2B Uncovered by Multiple Short Molecular Dynamics Simulations and MM-GBSA Calculations**

Lifei Wang<sup>a\*</sup>, Yan Wang<sup>a</sup>, Zhiyong Yang<sup>b\*</sup>, Shuobo Xu<sup>c</sup>, and Hongyun Li<sup>a</sup>

<sup>a</sup>School of Science, Shandong Jiaotong University, Jinan, 250357, China

<sup>b</sup>Department of Physics, Jiangxi Agricultural University, Nanchang, 330045, China

<sup>c</sup>School of Information Science and Electrical Engineering, Shandong Jiaotong University, Jinan, 250357, China

\*Corresponding Authors:

Lifei Wang, Email: fisherwang@126.com; wanglf@sdjtu.edu.cn (L. Wang).

Zhiyong Yang, Email: zhiyongyang2009@163.com (Z. Yang).

**Cotents:**

**Figure S1:-----S3**

**Figure S2:-----S4**

**Figure S3:-----S5**

**Figure S4:-----S6**

**Figure S5:-----S7**

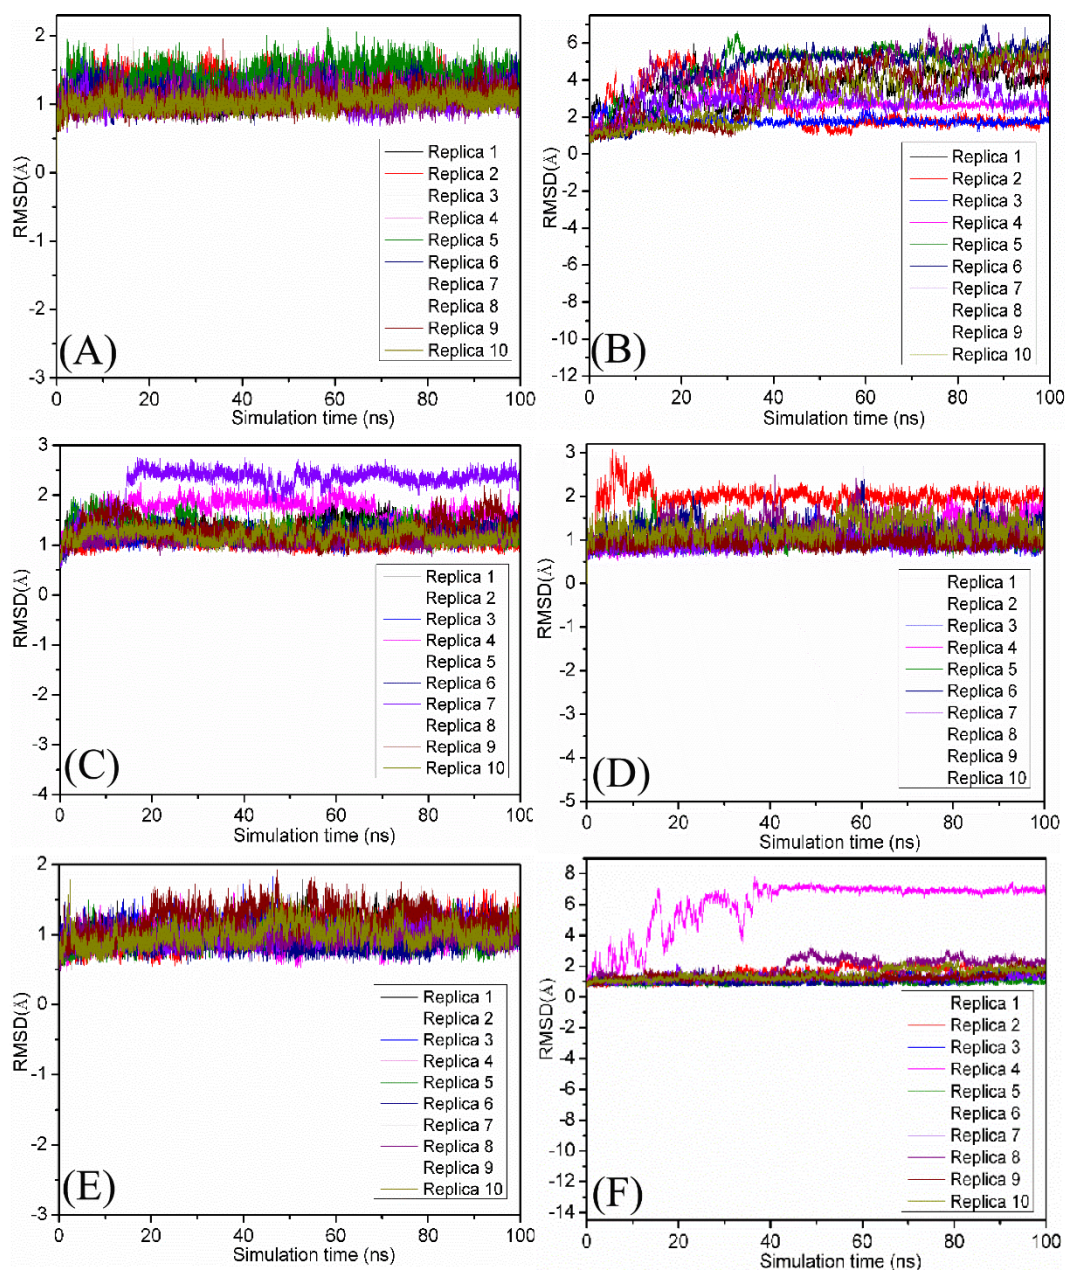

**Figure S1.** Root-mean-square deviations (RMSDs) of backbone atoms in BAZ2A and BAZ2B calculated by using MSMD trajectories of ten replicas: (A) the D8Q-BAZ2A complex, (B) the D8Q-BAZ2B complex, (C) the D9T-BAZ2A complex, (D) the D9T-BAZ2B complex, (E) the UO1-BAZ2A complex and (F) the UO1-BAZ2B complex.

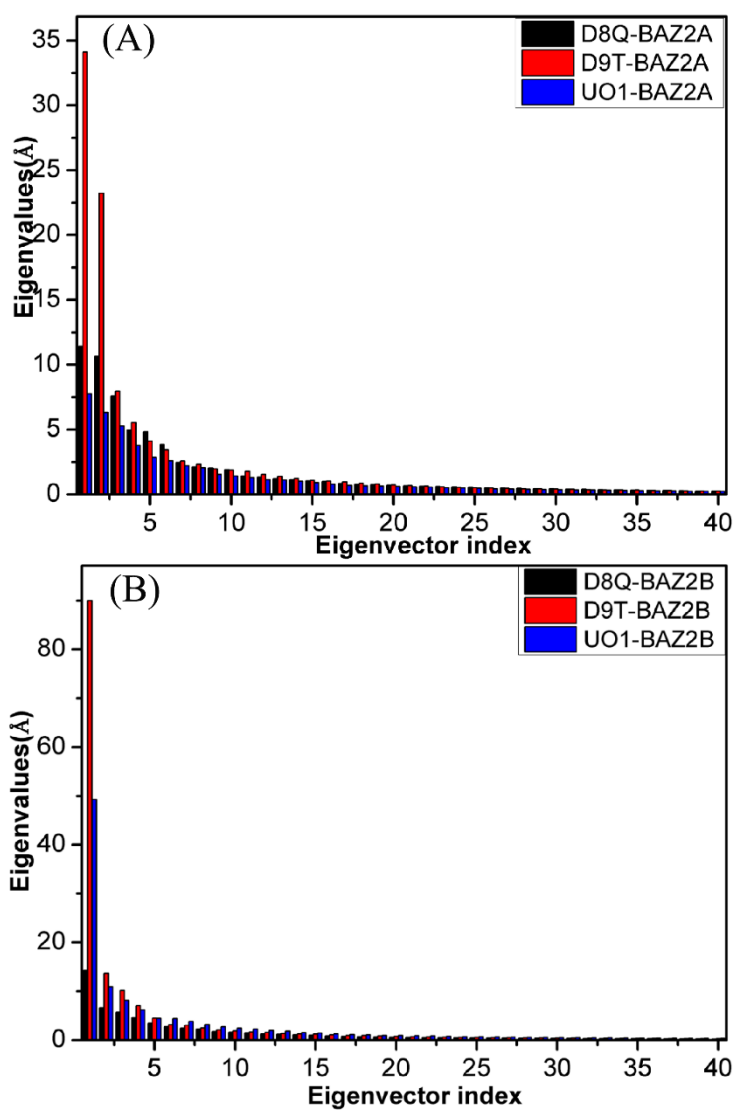

**Figure S2.** The function of eigenvalues versus eigenvector index stemming from PC analysis based on the single joined MSMD trajectory: (A) BAZ2A and (B) BAZ2B complexed with three inhibitors D8Q, D9T, and UO1.

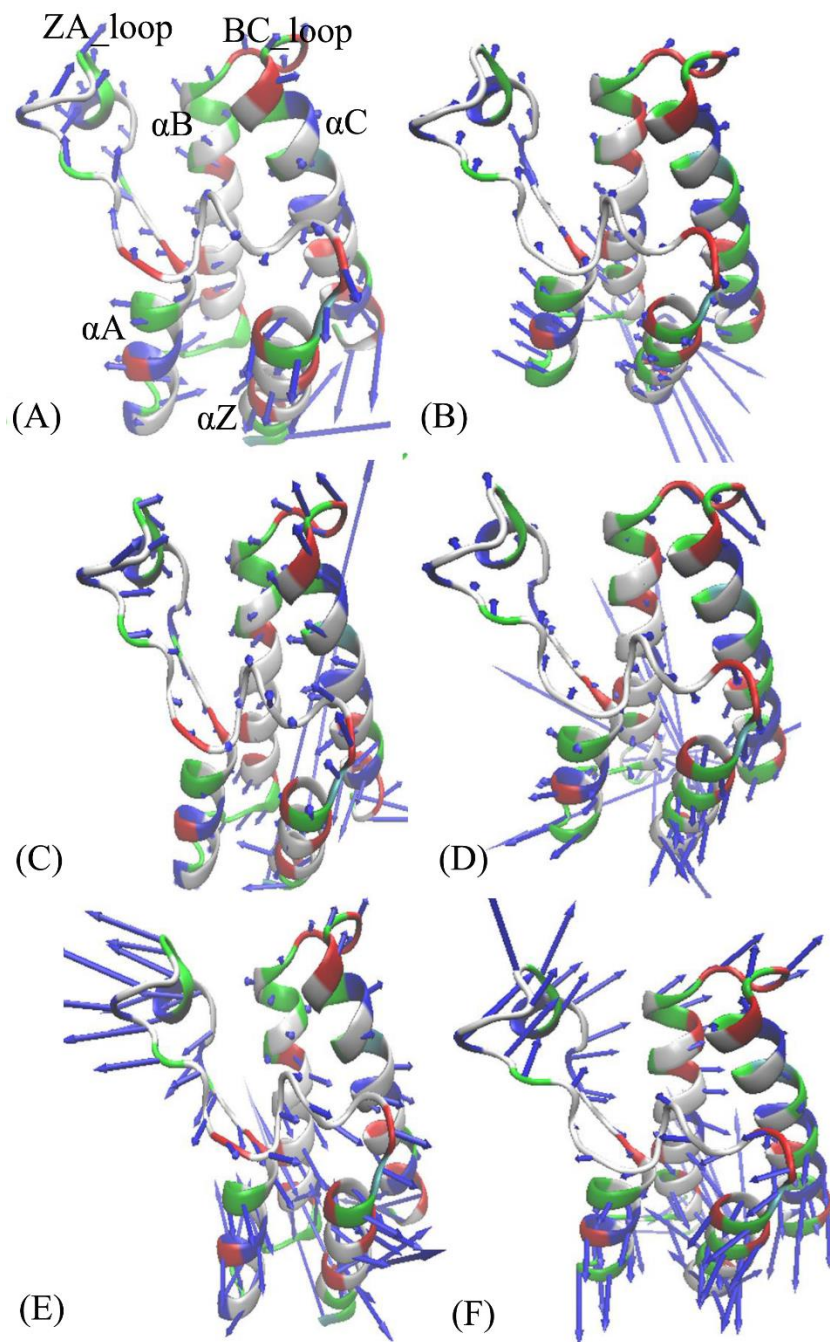

**Figure S3.** Collective motions corresponding to the first component PC1 obtained from principal component (PC) analysis based on the single joined trajectories: (A) the D8Q-BAZ2A complex, (B) the D8Q-BAZ2B complex, (C) the D9T-BAZ2A complex, (D) the D9T-BAZ2B complex, (E) the UO1-BAZ2A complex and (F) the UO1-BAZ2B complex.

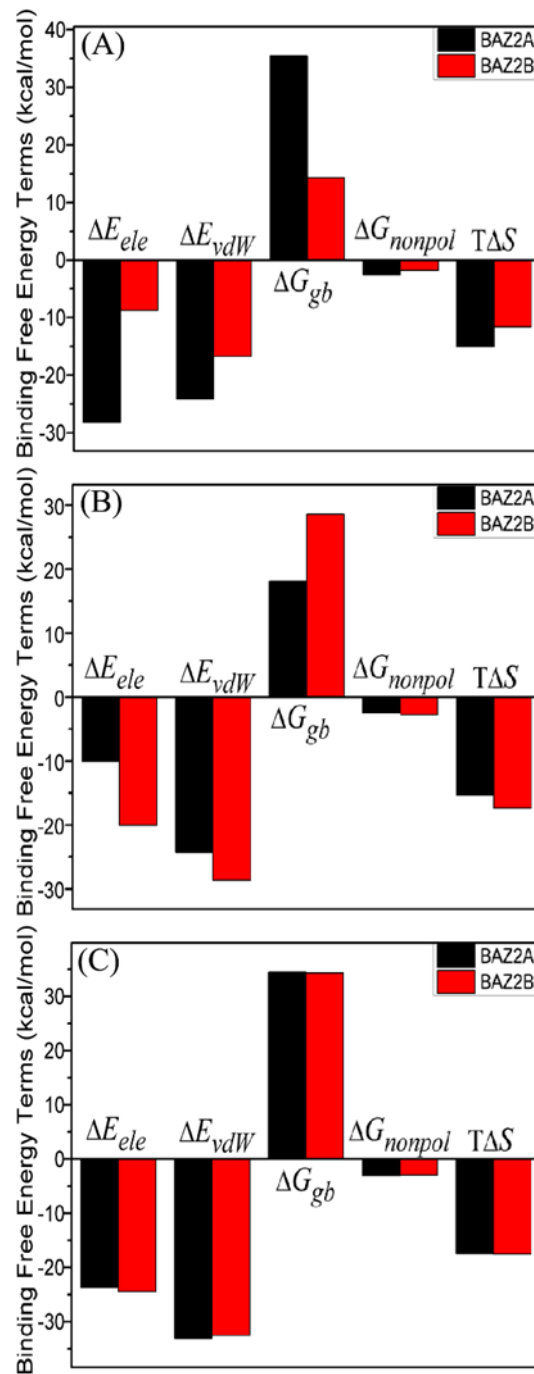

**Figure S4.** Comparisons between binding free energy terms of BAZ2A and BAZ2B, (A) D8Q, (B) D9T and (C) UO1.

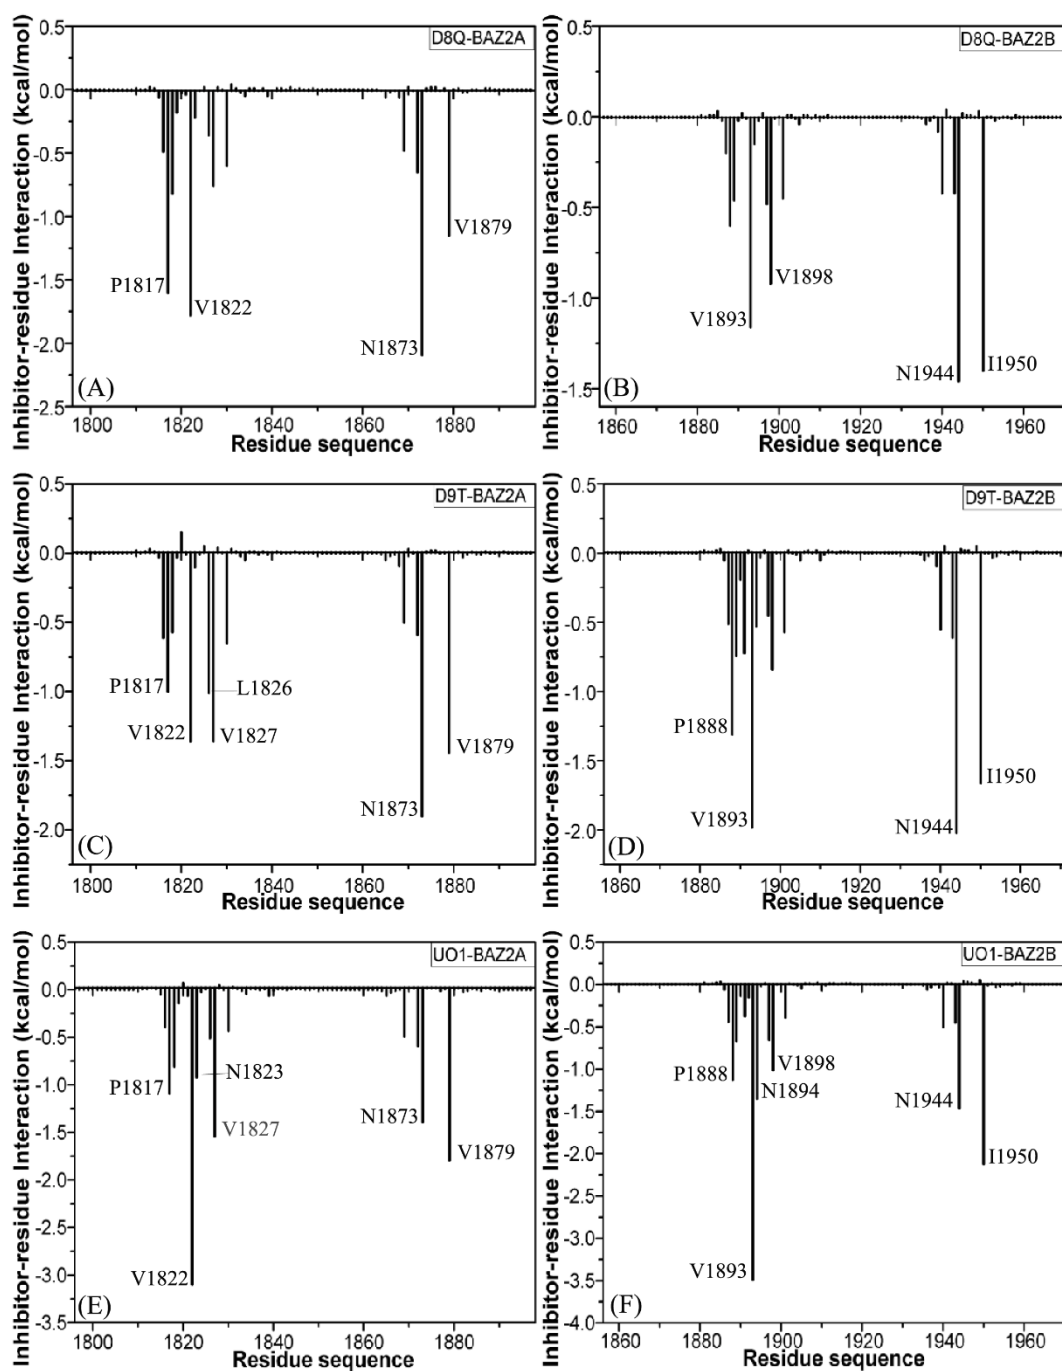

**Figure S5.** Inhibitor-Residue interactions computed by using residue-based free energy decomposition method, only residues stronger than 0.9 kcal/mol were labeled: (A) the D8Q-BAZ2A complex, (B) the D8Q-BAZ2B complex, (C) the D9T-BAZ2A complex, (D) the D9T-BAZ2A complex, (E) the UO1-BAZ2A complex and (F) the UO1-BAZ2B complex.
